# Supplementary material for: Paleoclimate-induced stress on polar forested ecosystems prior to the Permian–Triassic mass extinction
Source: Research Square preprint supplement (doi:10.21203/rs.3.rs-1108556/v1), 2021-12-01
Supplement: Supplementary file 2 [file bd574b174c20767fbf76b858.xlsx]

## Sheet: AllanHillsPermian
date	RWI
1	1.1
2	0.79
3	1.02
4	1.11
5	0.72
6	0.94
7	0.81
8	0.87
9	0.69
10	0.78
11	0.7
12	1.2
13	0.97
14	1.13
15	1.07
16	1.25
17	1.06
18	0.84
19	0.89
20	0.85
21	1.12
22	0.85
23	1.07
24	0.79
25	1.1
26	1.23
27	0.96
28	1.08
29	0.93
30	1.02
31	1.25
32	1.28
33	1.01
34	1.3
35	0.92
36	1.03
37	0.93
38	0.97
39	0.92
40	0.81
41	0.83
42	0.78
43	0.79
44	0.82
45	0.67
46	0.75
47	0.84
48	0.78
49	0.85
50	0.89
51	0.75
52	1.08
53	0.89
54	0.85
55	0.82
56	0.92
57	0.85
58	0.84
59	0.97
60	1.07
61	0.98
62	1.06
63	1.15
64	1.07
65	0.94
66	0.83
67	1.12
68	1.12
69	1
70	0.84
71	0.97
72	1.06
73	0.84
74	1.01
75	0.83
76	0.94
77	0.96
78	0.73
79	0.74
80	1.13
81	1.38
82	1.04
83	1.06
84	1.06
85	1
86	1.1
87	1.45

## Sheet: AllanHillsTriassic(ELG)
date	RWI
1	0.5
2	1.78
3	1.05
4	1.03
5	1.34
6	0.71
7	0.51
8	0.65
9	1.62
10	0.65
11	1.65
12	0.55
13	2.14
14	0.87
15	0.69
16	1.58
17	0.76
18	1.08
19	0.89
20	1.05
21	1.54
22	1.41
23	1.11
24	1.17
25	0.59
26	0.64
27	0.61
28	1.78
29	1.41
30	1.52
31	1.24
32	1.16
33	1.33
34	0.78
35	0.75
36	1.07
37	1.15
38	0.76
39	0.84
40	0.93
41	0.88
42	0.91
43	0.98
44	0.89
45	0.85
46	0.94
47	0.74
48	0.9
49	0.89
50	0.99
51	0.97
52	0.86
53	1.05
54	1.03
55	0.96
56	1.41
57	1.27
58	1.64
59	1.06
60	1.54
61	1.15
62	1.09
63	1.2
64	1.29
65	1.04
66	0.86
67	1.02
68	0.65
69	0.59
70	0.55
71	0.71
72	0.9
73	0.82
74	0.69
75	0.87
76	1.19
77	1.48
78	0.77
79	0.87
80	0.88
81	1.1
82	1.44
83	1.02
84	1.1
85	0.97
86	0.8
87	1.32
88	1.1
89	1.93
90	1.17
91	1.24
92	1.16
93	0.84
94	0.77
95	0.9
96	0.65
97	0.89
98	0.9
99	0.9
100	1.17
101	0.96
102	1.64
103	1.28
104	1.04
105	1.15
106	1.54
107	0.88
108	1.06
109	1.55
110	1.44
111	0.72
112	0.94
113	0.87
114	0.55
115	0.77
116	0.92
117	1.12
118	0.96
119	0.79
120	1.09
121	0.9
122	0.74
123	0.74
124	0.88
125	1.03
126	0.76
127	0.71
128	0.76
129	0.48
130	1.18
131	0.7
132	0.94
133	1.1
134	1.1
135	0.96
136	1.13
137	0.83
138	1.69
139	1.59
140	2.33
141	0.85
142	0.98
143	1.29
144	1.5
145	0.88
146	1.55
147	0.87
148	0.99
149	0.93
150	0.73
151	0.94
152	1.07
153	1.15
154	0.74
155	0.93
156	0.88
157	2.74
158	0.99
159	0.92
160	0.81
161	0.88
162	1.07
163	0.56
164	0.73
165	0.91
166	0.76
167	0.83
168	1.19
169	0.84
170	0.86
171	0.86
172	0.85
173	1.23
174	0.9
175	1.49
176	1.02
177	1.36
178	1.73
179	0.97
180	1.14
181	1.09
182	1.15
183	1.17
184	0.79
185	1.33
186	0.98
187	0.86
188	0.86
189	0.71
190	0.7
191	0.65
192	0.54
193	0.71
194	1.12
195	0.92
196	0.92
197	0.98
198	0.82
199	1.32
200	1.27
201	0.95
202	1.05
203	0.84
204	0.6
205	1.59
206	1.43
207	1.34
208	0.74
209	0.98
210	0.99
211	1.74
212	0.64
213	1.1
214	0.76
215	0.71
216	0.72
217	0.8
218	0.82
219	0.88
220	0.67
221	0.56
222	0.54
223	0.72
224	0.8
225	1.04
226	0.91
227	1.64
228	1.33
229	0.92
230	1.64
231	0.46
232	1.76
233	1.34
234	0.99
235	1.24
236	0.65
237	1.52
238	1.12
239	0.9

## Sheet: AllanHillsTriassic(VC)
date	RWI
1	1.17
2	1.21
3	1.09
4	1.13
5	0.69
6	1.68
7	0.69
8	0.87
9	0.79
10	1.51
11	0.82
12	0.91
13	0.94
14	1.28
15	0.85
16	1.1
17	0.97
18	1
19	1
20	1.1
21	0.78
22	0.89
23	0.8
24	0.72
25	0.93
26	0.9
27	0.81
28	0.65
29	0.95
30	1.14
31	1.1
32	0.96
33	0.93
34	0.8
35	0.79
36	0.9
37	1.09
38	1
39	0.66
40	0.96
41	0.97
42	0.89
43	1.16
44	1.11
45	0.88
46	1.16
47	1.02
48	1.28
49	1.19
50	1.4
51	1.46
52	1.18
53	1.25
54	1.19
55	1.36
56	1.09
57	1.01
58	0.7
59	0.85
60	0.61
61	0.74
62	0.65
63	0.68
64	1.16
65	1.35
66	1.09
67	1.28
68	0.92
69	0.93
70	0.6
71	0.68
72	0.97
73	0.74
74	0.83
75	0.99
76	1.17
77	1.3
78	0.92
79	1.01
80	1.61
81	1.21
82	1.17
83	0.88
84	1.37
85	1.18
86	0.7
87	0.97
88	1.05
89	1.07
90	0.98
91	1.27
92	0.84
93	0.75
94	0.95
95	0.84
96	0.84
97	0.77
98	0.85
99	0.96
100	0.9
101	0.88
102	0.78
103	0.88
104	0.9
105	0.73
106	1.18
107	1.17
108	1.23
109	1.03
110	1.07
111	0.82
112	0.94
113	0.52
114	0.94
115	0.84
116	0.87
117	0.75
118	1.05
119	0.74
120	0.86
121	0.51
122	0.56
123	0.56
124	0.46
125	0.48
126	0.81
127	0.85
128	0.43
129	0.65
130	1.04
131	1.24
132	0.75
133	0.62
134	0.96
135	0.55
136	0.54
137	0.64
138	1.19
139	1.16
140	0.99
141	1.39
142	0.96
143	1.54
144	0.83
145	0.69
146	1.02
147	0.91
148	1.04
149	0.8
150	0.79
151	0.75
152	0.88
153	0.88
154	0.96
155	0.76
156	0.88
157	0.97
158	0.82
159	1.09
160	0.94
161	0.84
162	0.72
163	1.16
164	0.61
165	0.83
166	0.72
167	0.77
168	1
169	1
170	0.84
171	1.1
172	1.2
173	1.04
174	1.21
175	1.12
176	0.78
177	1
178	1.08
179	0.98
180	1.11
181	1.11
182	1.01
183	1.27
184	1.53
185	0.54
186	1.32
187	1.21
188	1.47
189	1.21
190	1.27
191	1.02
192	1.82
193	0.75
194	1.82
195	0.95
196	1.34
197	1.1
198	1.26
199	1.06
200	1.3
201	1.61
202	0.82
203	1.28
204	1.41
205	1.27

## Sheet: CollinsonRidge
date	RWI
1	0.81
2	0.9
3	0.82
4	1.33
5	0.9
6	1.07
7	1.51
8	2.07
9	1.48
10	1.09
11	0.54
12	1.1
13	1.66
14	0.95
15	1.87
16	1.25
17	0.64
18	0.9
19	0.77
20	0.84
21	0.84
22	1.01
23	0.89
24	0.62
25	0.55
26	0.5
27	0.38
28	0.27
29	0.68
30	0.94
31	0.38
32	1.84
33	0.65
34	1.41
35	1.26
36	0.95
37	1.33
38	1.09
39	1.33
40	1.03
41	1.22
42	1.27
43	1.25
44	1.44
45	1.3
46	1.29
47	0.82
48	1.24
49	1.31
50	0.96
51	0.75
52	0.81
53	1.03
54	0.52
55	0.68
56	0.64
57	0.51
58	0.52
59	0.73
60	1.1
61	1.33
62	0.98
63	1.27
64	1.23
65	1.65
66	1.34
67	0.82
68	0.7
69	1.05
70	0.93
71	1.32
72	0.83
73	0.97
74	1.1
75	1.32
76	0.99
77	1.05
78	1
79	1.36
80	1.09
81	0.99
82	1.02
83	0.95
84	1.1
85	0.89
86	0.81
87	0.87
88	0.96
89	1.13
90	0.72
91	1.05
92	1.42
93	1.27
94	1.04
95	1.02
96	1.27
97	1.01
98	1.17
99	1.29
100	1.14
101	1.05
102	1.04
103	1.13
104	1.11
105	0.83
106	0.82
107	0.85
108	0.85
109	0.93
110	1.06
111	1.32
112	1.38
113	1.14
114	1.36
115	1.05
116	1.12
117	1.42
118	1.11
119	1.38
120	1.21
121	1.54
122	1.21
123	1.15
124	0.88
125	0.84
126	0.64
127	0.8
128	0.62
129	0.78
130	0.94
131	1.25
132	0.73
133	1.32
134	1.06
135	1.09
136	0.59
137	1.77
138	0.95
139	1.29
140	0.95
141	2.27
142	2.36
143	1.53
144	1.76
145	1.12
146	0.85
147	0.44
148	0.62
149	0.69
150	1.71
151	1.28
152	0.98
153	1
154	0.45
155	0.86
156	1.02
157	0.68
158	0.53
159	1.47
160	1.57
161	1.7
162	0.78
163	1.23
164	1.22
165	0.83
166	1.59
167	1.27
168	1.23
169	0.81
170	0.81
171	1.18
172	1.1
173	0.96
174	0.86
175	1.06
176	0.99

## Sheet: McIntyrePromontory
date	RWI
1	0.66
2	1.15
3	1.37
4	0.98
5	1.38
6	0.82
7	0.91
8	1.07
9	0.69
10	0.77
11	1.06
12	1.23
13	1.12
14	1.29
15	1.02
16	0.87
17	0.72
18	0.87
19	1.18
20	0.75
21	0.94
22	1.48
23	0.7
24	1.41
25	1.2
26	0.66
27	0.55
28	0.71
29	1.02
30	1.06
31	1.19
32	1.17
33	1.5
34	1.06
35	1.27
36	0.93
37	0.46
38	0.4
39	1.44
40	1.04
41	0.8
42	0.78

## Sheet: ShenkPeak
date	RWI
1	1.34
2	1.47
3	1.48
4	0.74
5	0.87
6	0.49
7	0.71
8	1.44
9	0.98
10	0.67
11	1.84
12	0.63
13	0.81
14	1.07
15	1.23
16	0.95
17	0.78
18	0.51
19	1.49
20	0.87
21	1.71
22	1.12
23	1.27
24	0.54
25	0.93
26	1.08
27	1.43
28	1.03
29	0.98
30	0.72
31	0.87
32	0.126
33	0.98
34	1.68
35	0.13
36	1.12
37	0.58
38	1.06
39	1.01
40	0.92
41	0.75
42	1.03
43	1.09
44	0.92
45	0.8
46	0.98
47	0.89
48	0.77
49	0.92
50	1.06
51	0.84
52	0.76
53	1.05
54	0.95
55	0.83
56	1.1
57	1.01
58	0.9
59	1.51
60	1.41
61	0.94
62	1.47
63	0.94
64	0.82
65	0.64
66	0.66
67	0.89
68	0.82
69	0.98
70	1.16
71	1.19
72	0.88
73	1.43
74	0.94
75	0.54
76	0.67
77	0.46
78	0.6
79	0.52
80	0.74
81	0.87
82	1.76
83	1.1
84	0.74
85	0.58
86	1.5
87	0.9
88	1.39
89	0.88
90	1.17
91	2.25
92	1.56
93	2.26
94	0.69
95	1.09
96	1.56
97	1.78
98	0.72
99	1.1
100	0.93
101	0.86
102	1.65
103	0.95
104	1.03
105	1.4
106	0.87
107	0.62
108	0.72
109	1.08
110	1.48
111	1.14
112	0.75

## Sheet: CR_Dendro_Data
F4	F5-1	F5-2	F6-1	F6-2	F6-3	F7	F9-1	F9-2	F9-3	F9-4	F26-1	F26-2	F27-1	F27-2	F27-3
			600
			680
			630
			1040
			720
			870
			1250
			1740
			1260
			950
			300	510
			1460	410
			1880	930
			1050	590
			2380	960
			1460	810
			630	540
			550	1090
			740	730
			300	1300
			570	1080
			580	1440
			420	1380
			290	1000
			620	560
			290	790
			720	130
			260	350
			760	720		720
			1550	920		660
			230	290		680
			2170	1740		2200
			370	980		830
			1690	2120		1110
			1580	1860		1010
			280	2000		1060
			2050	1990	1300	1260
			120	1740	1590	1860
			2350	2340	1160	880
			310	2140	910	1680
			2520	1620	550	1400
			1350	1500	970	2350
			580	1260	1470	2690
			2190	1260	1780	1940
			1200	1450	2220	1610
			1640	2630	1350	1030
			1060	1160	1330	650
			1850	1840	2130	570
			2100	2280	1620	870
			1480	1500	930	1070
			1340	1200	690	730
			1290	1290	580	1110
			990	960	760	2480
			910	750	630	480
			800	1120	570	1080
			1470	1250	320	550
			610	610	260	1200
			970	920	520	470
			850	900	1580	480
			1320	1480	2180	850
			1860	2180	1720	1500
			1180	1350	1710	1040
			1660	1820	2240	1230
			2280	430	2420	1640
			2720	3630	1730	1380
			4060	1080	1790	950
			3210	370	430	1640					1020
			830	480	1160	1300					2040
			330	2110	1420	1600					3120
1000			610	1620	1080	1420					2880			2530
960			3690	3070	1610	1820					3780	1020		1280
1030			630	1930	910	1070					2600	1790		1400	1010
580			1570	2270	1470	1170	850				1090	2250		2120	3060
580			2320	2730	2190	1570	1480				1550	2280	870	3170	2040
970			800	920	1350	3410	1950				3380	3690	2930	3500	2940
2240			700	480	1560	1150	1460				780	1380	2870	3740	2620
440			2990	600	990	1880	2460				1660	2160	3520	3650	1310
1130			3700	1050	1030	1890	2220				770	1510	2040	2590	1530
1750			4460	3410	860	2590	2620				860	1540	2630	2840	2070
1900			2050	1010	870	1510	2160				1730	2480	2130	3600	1570
1060			2840	620	1130	1480	1870				1320	1460	2030	4350	1890
410			3170	550	680	1770	1100				1640	3410	2280	3590	2050
560			2870	950	980	2090	1720				1730	1580	1670	2600	1990
570			3090	740	1040	1120	4510				2320	1920	1760	2700	2150
1500			2600	350	1440	930	1610				1300	1630	1900	2310	1610
1090			1830	290	1880	1250	880				1200	1650	1090	3180	1490
1020			2250	440	1130	1540	850				1420	1180	2020	3330	2090
900			2180	310	1300	2030	1420				1370	1970	3040	2720	1770
1010			2690	690	3190	2270	660				1340	1030	3650	3290	2890
1190			680	370	1400	1410	990				1030	1390	2060	1640	1680
1010			1470	2750	3690	2260	1270				1370	1170	1490	1580	910
550			680	4580	2720	2620	1770				1250	1570	3110	5580	1550
820			540	3310	2590	3000	2930				1280	1390	2530	1070	3380
930			500	2320	2450	1630	1540				1320	850	1990	3010	2710
640			680	2110	1850	1570	2280				1900	1230	2620	1890	1880
1040			1720	3090	610	1900	2130				4580	1210	2460	1650	3090
2790				910	1160	990	750				2620	900	3030	1500	2790
2020				1040	5980	1100	1020				1020	980	2440	1790	3030
2910				2490	3130		900					920	2250	910	2540
2110				1980	490		410		660			3130	1810	1600	2330
1730				2040	830		1440		450			1870	1930	1440	2150
1960				1890	980		1330		250	640		2040	1990	1690	1750
1710				1500	710		3520		430	430		1260	3730	1870	2490
3090				2100	360		570	590	470	290		1090	1910	2020	3060
1840				1020	210		2890	540	420	400			1910	1320	1290
1650				580	160		4200	230	770	470			2000	1360	2020
1680				330	1050		2830	430	1440	420			1960	1740	1530
2520				730	410		2410	500	2080	740			640	640	1170
1260				510	300			380	2000	1400			1920	1940	690
1110				560	270			680	2730	2180			1610	1200	1150
3890				630	150			1630	1950	1980			1980	1630	1700
1880				580	2830			2090	3430	760			2070	1930	2040
1460	480			600	3740			1780	2150	1070			1820	1300	2410
2310	470			1670	3880			2510	950	1270			2140	1580	2100
1040	1060				2370			2270	1830	1250			1590	1200	1760
1320	1050				2260			3240	1170	1590			1410	1170	2530
2950	1740				3850			1910	1380	3630			530		1680
450	930				2170			1930	1850	3170			1130		2210
3230	1460				3490			1720	2640	2040			1280		1760
1100	1030				2120			1170	3260	2920			1620		1840
1220	1660				2180			1930	2150	6180			1860		2100
2290	2870				2500			1790	570	1980			1340		1600
2840	1920				3730			810	1540	1610			1150		1070
1860	1710				1190			1910	910	960			890		1380
1490	1130				200			2030	1500	770			1060		1950
890	1390				260			1980	1060	650					920
2030	1880	860			370			1970	760	1160					1060
770	740	960			540			860	2770	930
1850	1020	1860			540			870	530	2880
1040	1220	1280			540			2040	2940	2990
2800	2330	850			750			1660	3620	3910
1470	650	940			430			1050	2650	2820
2540	1980	1910			450			3530	2990	2860
	970	1350			1890
	560	2180
	560	840
	1980	2060
	950	1220
	1330	1590
	870	1300
	3550	1100
	3380	1510
	1410	1990
	2070	1640
	710	1840
	350	1650
	220	800
	250	1180
	330	1230
	590	3340
	950	1770
	960	1010
	860	1190
	270	700
	660	1110
	780	1290
	580	760
	460	580
	1430	1340
	1820	970
	1680	1450
	810	600
	1180	1060
	1390	700
	450	1180
	930	2150
	710	1730
	620	1770
	480	1040
	640	790
	970	1080
	920	960
		1020
		910
		1110
		1030
