# Supplementary material for: Paleoclimate-induced stress on polar forested ecosystems prior to the Permian–Triassic mass extinction
Source: Research Square preprint supplement (doi:10.21203/rs.3.rs-1108556/v1), 2021-12-01
Supplement: Supplementary file 3 [file e9db7b5bce50ecc413510013.xlsx]

## Sheet: Permian
Location	Graphite Peak (CTAM)
Formation	Buckley (Upper)
Reference	Retallack and Krull, 1999
		Weight Percent						mol
Sample ID	Paleosol Order	Al2O3	CaO	MgO	Na2O	K2O		Al2O3	CaO	MgO	Na2O	K2O	CIA	CIA-K	ET	Eppt	Enpp	Peff	MAP	%Eppt
Waller Bw	Protosol	10.67	0.99	0.31	0.74	1.94		1.56969e-05	2.6481e-06	1.1537e-06	1.79091e-06	3.08917e-06	67.5859	77.9547	21.4534	7955.43	31821.7	81.239	1026.92	21
Evelyn Bw	Protosol	13.95	0.67	0.43	0.84	3.13		2.05221e-05	1.79215e-06	1.6003e-06	2.03293e-06	4.98408e-06	69.9667	84.2895	22.013	7935.98	31743.9	94.3288	1163.42	21
Evelyn Bw	Protosol	15.81	0.59	0.69	0.86	3.29		2.32584e-05	1.57816e-06	2.56792e-06	2.08133e-06	5.23885e-06	72.3282	86.405	22.216	7904.99	31620	99.0769	1212.93	21
Evelyn Bw	Protosol	16.15	0.67	0.72	0.86	3.29		2.37586e-05	1.79215e-06	2.67957e-06	2.08133e-06	5.23885e-06	72.2784	85.9819	22.1747	7905.76	31623.1	98.1115	1202.86	21
Dolores A	Protosol	15.78	4.18	0.95	3.23	0.26		2.32143e-05	1.11809e-05	3.53554e-06	7.8171e-06	4.14013e-07	54.4601	54.9942	19.9214	7849.93	31399.7	45.4062	653.277	21
Dolores Bw	Protosol	18.24	0.33	1.76	0.23	3.17		2.68332e-05	8.82699e-07	6.55006e-06	5.56635e-07	5.04777e-06	80.5311	94.9091	23.123	7706.78	30827.1	120.291	1434.14	21
William Bw	Protosol	18	0.33	1.07	0.98	3.18		2.64802e-05	8.82699e-07	3.98214e-06	2.37175e-06	5.06369e-06	76.0961	89.055	22.4825	7831.41	31325.6	105.311	1277.93	21
Location	Portal Mt (SVL)
Formation	Weller Coal Measures (Upper)
Reference	Sheldon et al., 2014
		Weight Percent						mol
Sample ID	Paleosol Order	Al2O3	CaO	MgO	Na2O	K2O		Al2O3	CaO	MgO	Na2O	K2O	CIA	CIA-K	ET	Eppt	Enpp	Peff	MAP	%Eppt
11	Protosol	10.24	0.87	0.81	1.14	1.94		1.50643e-05	2.32712e-06	3.01451e-06	2.75898e-06	3.08917e-06	64.8218	74.7593	21.1965	7963.14	31852.6	75.2307	964.272	21
12	Protosol	12.33	0.38	1.28	1.07	2.44		1.81389e-05	1.01644e-06	4.76368e-06	2.58956e-06	3.88535e-06	70.7715	83.4168	21.9317	7926.73	31706.9	92.4271	1143.59	21
13	Protosol	10.56	0.53	1.1	1.02	2.01		1.5535e-05	1.41767e-06	4.09378e-06	2.46856e-06	3.20064e-06	68.6726	79.9898	21.6256	7948.02	31792.1	85.2675	1068.93	21
14	Protosol	10.52	1.1	1.01	1.23	1.88		1.54762e-05	2.94233e-06	3.75884e-06	2.97679e-06	2.99363e-06	63.4558	72.3345	21.0121	7961.06	31844.2	70.9172	919.293	21
14.95	Protosol	9.69	0.33	0.82	1.11	1.75		1.42552e-05	8.82699e-07	3.05173e-06	2.68637e-06	2.78662e-06	69.1634	79.9763	21.6245	7943.87	31775.5	85.2402	1068.65	21
16.05	Protosol	10.54	0.33	1.13	1.09	1.96		1.55056e-05	8.82699e-07	4.20543e-06	2.63797e-06	3.12102e-06	70.0113	81.4958	21.7576	7935.5	31742	88.3543	1101.12	21
17	Protosol	7.14	0.2	0.55	1.24	1.13		1.05038e-05	5.34969e-07	2.04689e-06	3.00099e-06	1.79936e-06	66.3155	74.8147	21.2008	7960.95	31843.8	75.3316	965.324	21
18.05	Protosol	8.12	0.2	0.43	1.17	1.44		1.19455e-05	5.34969e-07	1.6003e-06	2.83158e-06	2.29299e-06	67.8527	78.0137	21.4583	7953.84	31815.3	81.3535	1028.12	21
19	Protosol	7.81	2.29	0.63	0.98	1.18		1.14895e-05	6.1254e-06	2.34462e-06	2.37175e-06	1.87898e-06	52.5458	57.4858	20.0562	7804.46	31217.9	48.558	686.142	21
20	Protosol	8.62	0.46	0.72	1.67	1.51		1.26811e-05	1.23043e-06	2.67957e-06	4.04166e-06	2.40446e-06	62.2915	70.6342	20.8879	7956.2	31824.8	68.0131	889.01	21
20.5	Protosol	11.98	0.5	1.05	0.99	2.47		1.7624e-05	1.33742e-06	3.9077e-06	2.39595e-06	3.93312e-06	69.6863	82.5195	21.8496	7938.89	31755.5	90.5056	1123.55	21
21	Protosol	8.29	0.9	0.65	1.84	1.24		1.21956e-05	2.40736e-06	2.41905e-06	4.45308e-06	1.97452e-06	57.9899	63.9986	20.4413	7913.7	31654.8	57.566	780.073	21
22	Protosol	10.06	0.14	0.56	1.1	2.03		1.47995e-05	3.74478e-07	2.08411e-06	2.66217e-06	3.23248e-06	70.2442	82.9747	21.8911	7932.94	31731.8	91.4762	1133.67	21
Location	Allan Hills (SVL)
Formation	Weller Coal Measures (Upper)
Reference	Retallack and Krull, 1999
		Weight Percent						mol
Sample ID	Paleosol Order	Al2O3	CaO	MgO	Na2O	K2O		Al2O3	CaO	MgO	Na2O	K2O	CIA	CIA-K	ET	Eppt	Enpp	Peff	MAP	%Eppt
Susanne	Protosol	6.11	0.41	0.29	0.01	1.06		8.98855e-06	1.09669e-06	1.07927e-06	2.42015e-08	1.6879e-06	76.1913	88.9125	17.612	7829.17	31316.7	-8.612	90	21
Susanne	Protosol	9.78	0.62	0.28	0.01	1.49		1.43876e-05	1.6584e-06	1.04205e-06	2.42015e-08	2.37261e-06	78.0119	89.5296	17.612	7782.62	31130.5	-8.612	90	21

## Sheet: Triassic
Location	Graphite Peak (CTAM)
Formation	Fremouw (Lower-Middle)
Reference	Sheldon, 2006
		Weight Percent						mol
Sample ID	Paleosol Order	Al2O3	CaO	MgO	Na2O	K2O		Al2O3	CaO	MgO	Na2O	K2O	CIA	CIA-K	ET	Eppt	Enpp	Peff	MAP	%Eppt
2059	Protosol	15.53	4.01	0.96	1.06	1.57		2.28465e-05	1.07261e-05	3.57276e-06	2.56536e-06	2.5e-06	59.1296	63.2202	25.0593	15246	57353.8	51.7608	768.202	21
2058	Protosol	14.82	1.01	1.19	0.52	2.45		2.1802e-05	2.70159e-06	4.42873e-06	1.25848e-06	3.90127e-06	73.4981	84.6283	28.1222	15931.3	59932	88.9988	1171.21	21
GP13	Protosol	15.01	1.08	1.12	0.59	2.5		2.20815e-05	2.88883e-06	4.16822e-06	1.42789e-06	3.98089e-06	72.6865	83.6477	27.9519	15916.5	59876.3	86.9283	1148.8	21
2057	Protosol	15.51	1.13	1.31	0.6	2.57		2.28171e-05	3.02258e-06	4.87533e-06	1.45209e-06	4.09236e-06	72.7027	83.6043	27.9444	15916.8	59877.5	86.8376	1147.82	21
2056	Protosol	15.57	4.53	1.04	2.73	0.37		2.29054e-05	1.21171e-05	3.87049e-06	6.60702e-06	5.89172e-07	54.2542	55.022	24.1886	14809.7	55712.5	41.1749	653.635	21
GP14	Protosol	14.72	2.69	1.05	2.17	0.83		2.16549e-05	7.19534e-06	3.9077e-06	5.25173e-06	1.32166e-06	61.1312	63.5004	25.0917	15395.2	57915.2	52.1538	772.455	21
2055	Protosol	15.78	4.18	0.95	3.23	0.26		2.32143e-05	1.11809e-05	3.53554e-06	7.8171e-06	4.14013e-07	54.4601	54.9942	24.1859	14830.2	55789.7	41.1418	653.277	21
2054	Protosol	12.98	3.56	1.21	2.08	0.42		1.90951e-05	9.52245e-06	4.50316e-06	5.03392e-06	6.6879e-07	55.638	56.7438	24.36	14944	56217.9	43.2586	676.186	21
GP15	Protosol	12.49	1.42	1.6	0.75	1.21		1.83743e-05	3.79828e-06	5.9546e-06	1.81512e-06	1.92675e-06	70.9037	76.5989	26.8199	15873.9	59716	73.1658	999.857	21
GP16	Protosol	14.45	1.53	0.97	1.13	2.01		2.12577e-05	4.09251e-06	3.60997e-06	2.73477e-06	3.20064e-06	67.9472	75.6906	26.6852	15772.8	59335.9	71.5275	982.127	21
Location	Allan Hills (SVL)
Formation	Lashly A
Reference	This Study (Gulbranson et al.) see "MajorElementData"
		Weight Percent						mol
Sample ID	Paleosol Order	Al2O3	CaO	MgO	Na2O	K2O		Al2O3	CaO	MgO	Na2O	K2O	CIA	CIA-K	ET	Eppt	Enpp	Peff	MAP	%Eppt
Bw	Alfisol							0.000223711	7.26867e-05	4.33257e-05	4.53614e-05	0.000296215	35.0659	65.4587	25.3226	16146.1	45480.2	54.9611	802.837	26.2
Btv	Alfisol							0.000236456	6.96205e-05	6.26265e-05	4.00042e-05	0.000319098	35.5477	68.324	25.6769	16263.5	45810.8	59.2688	849.457	26.2
Btg	Alfisol							0.00018538	0.000179486	2.8041e-05	2.54618e-05	0.000180846	32.456	47.4934	23.5039	15487	43623.7	32.8499	563.538	26.2
Cg1	Alfisol							0.000179241	0.000263904	4.45576e-05	2.18538e-05	0.000208709	26.6052	38.5466	22.8118	13865.9	39057.3	24.4356	472.474	26.2
Cg2	Alfisol							0.000171534	0.000163605	9.82577e-05	1.86267e-05	0.000146364	34.2979	48.488	23.5886	15956.3	44945.5	33.8803	574.689	26.2
Location	Allan Hills (SVL)
Formation	Feather Conglomerate
Reference	Retallack and Krull, 1999
		Weight Percent						mol
Sample ID	Paleosol Order	Al2O3	CaO	MgO	Na2O	K2O		Al2O3	CaO	MgO	Na2O	K2O	CIA	CIA-K	ET	Eppt	Enpp	Peff	MAP	%Eppt
Edwin A	Alfisol	4.33	0.07	0.25	0.24	0.85		6.36995e-06	1.87239e-07	9.30406e-07	5.80837e-07	1.3535e-06	75.0154	89.2397	28.9687	21303.4	60007.3	99.2903	1282.59	26.2
Dolores Bw	Protosol	14.03	0.86	1.45	2.41	1.56		2.06398e-05	2.30037e-06	5.39635e-06	5.83257e-06	2.48408e-06	66.033	71.7339	26.1254	15687.1	59013.6	64.7226	908.48	21
Location	Allan Hills (SVL)
Formation	Lashly A
Reference	Retallack and Krull, 1999
		Weight Percent						mol
Sample ID	Paleosol Order	Al2O3	CaO	MgO	Na2O	K2O		Al2O3	CaO	MgO	Na2O	K2O	CIA	CIA-K	ET	Eppt	Enpp	Peff	MAP	%Eppt
John Clay	Alfisol	19.34	0.26	0.32	0.25	1.79		2.84515e-05	6.9546e-07	1.19092e-06	6.05038e-07	2.85032e-06	87.2683	95.6289	30.2762	21030	59237.1	115.186	1454.63	26.2
John Clay	Alfisol	20.76	0.33	0.33	0.27	1.89		3.05405e-05	8.82699e-07	1.22814e-06	6.53441e-07	3.00955e-06	87.0442	95.211	30.1855	21042.8	59273.2	114.085	1442.7	26.2
John Clay	Alfisol	20.62	0.29	0.29	0.35	2.27		3.03345e-05	7.75705e-07	1.07927e-06	8.47054e-07	3.61465e-06	85.2766	94.9221	30.1233	21133.7	59529.3	113.328	1434.51	26.2
John Clay	Alfisol	21.95	0.31	0.28	0.42	2.93		3.22911e-05	8.29202e-07	1.04205e-06	1.01646e-06	4.66561e-06	83.2194	94.5933	30.0529	21216.7	59763	112.472	1425.25	26.2

## Sheet: LSTs
Antarctica	Sample ID	m (for correction)	K corrected	CIA corrected	LST		e. Australia	depth (m)	CIA corr	LST	e. Australia	depth (m)	CIA corr	LST	e. Australia	depth (m)	CIA corr	LST	e. Australia	depth (m)	CIA corr	LST	e. Australia	depth (m)	CIA corr	LST	e. Australia	depth (m)	CIA corr	LST	e. Australia	depth (m)	CIA corr	LST	North China	Formation	CIAcorr	LST
Graphite Peak	GP1	0.127323	5.02553e-06	0.632202	9.7033	Permian	Bowen Basin	69.85	0.852358	16.6607	Bowen Basin	196.91	76.939	16.9887	Bowen Basin	45.93	76.7817	15.8524	Bowen Basin	1155.08	76.7416	15.7859	Sydney Basin	163.958	81.5855	17.3235	Sydney Basin	637.36	80.8525	19.7693	Sydney Basin	802.81	76.6526	7.14852	Lu et al., 2020	Liujiagou	85.81	23.3117
Sheldon, 2006	GP2	0.00930954	1.85784e-07	0.846283	21.6918	Permian	Frank et al., 2021	75.06	0.906766	19.9164	Frank et al., 2021	200.33	74.8778	14.4235	Frank et al., 2021	50.1	77.2861	16.3097	Frank et al., 2021	1155.3	74.5197	13.6473	Frank et al., 2021	173.102	80.9523	19.1609	Frank et al., 2021	661.09	77.1993	13.5326	Frank et al., 2021	819.4	72.7552	9.77924		Liujiagou	85.39	23.0723
	GP3	0.118841	4.43984e-06	0.836477	21.1427	Permian	Core ENS7	76.2	0.889907	16.1472	Core SS19	206.43	75.509	15.4695	Core T10	55.01	77.5285	17.5001	Core MEE5	1155.7	75.0831	13.8787	Core WL16	185.904	79.9841	16.1563	Core phkb1	675.68	76.7168	14.0452	Core phke1	826.9	77.4178	12.6455		Sunjiagou	85.4	23.078
	GP4	0.12844	4.34622e-06	0.836043	21.1184	Permian		79.3	0.905646	18.0755		230.4	74.6681	14.4668		59.92	76.5663	15.3564		1155.94	74.1133	12.1669		201.092	80.7605	19.3865		699.07	77.5258	14.0292		832.53	77.6579	12.8254		Sunjiagou	86.25	23.5625
	GP5	0.135821	4.2128e-06	0.55022	5.11233	Permian		82.91	0.89984	17.8634		243.61	74.9188	15.7082		65.9	76.8193	16.3149		1156.14	77.4597	15.473		207.06	81.1953	20.0874		709.24	79.1018	14.8713		835.76	77.8479	13.4497		Sunjiagou	83.72	22.1204
	GP6	0.122576	2.68966e-06	0.635004	9.86025	Permian		85.37	0.895933	18.0695		251.83	76.5143	15.4969		70.83	75.5047	14.7498		1156.4	72.257	12.1583		212.217	81.1746	16.7206		713.76	84.8898	20.1155		835.76	77.8479	14.1703		Sunjiagou	80.68	20.3876
	GP7	0.00803213	2.67657e-07	0.549942	5.09676	Permian		87.93	0.88806	17.1431		264.1	76.0577	15.8393		75.8	76.4163	16.3524		1156.75	76.8218	17.6737		218.389	80.5572	16.7497		728.11	80.3199	14.2583		839.12	78.2568	9.61954		Sunjiagou	80.99	20.5643
	GP7	0.135606	5.80682e-06	0.567438	6.07652	Permian		88.7	0.740762	10.7601		274.83	74.6515	13.0003		80.92	76.7039	17.3726		1157	72.5687	11.526		222.809	80.9367	17.5588		733.13	82.9123	15.9991		840.9	76.2478	14.4689		Sunjiagou	82.1	21.197
	2064	0.0138249	3.9031e-07	0.765989	17.1954	Permian		90.4	0.908822	18.3897		278.13	76.3378	15.2371		82.35	77.0789	16.6146		1157.11	66.536	8.40403		222.986	79.9891	16.6027		745.62	78.6262	13.1214		840.9	76.2478	13.3335		Sunjiagou	79.79	19.8803
	GP8	0.0847093	1.85819e-06	0.756906	16.6867	Permian		91.59	0.919868	20.4047		278.45	77.4599	17.4446		82.68	77.3311	16.592		1157.85	71.5309	11.7104		223.266	80.4988	16.7707		760.09	83.4722	20.9863		846.75	77.7669	13.3705		Sunjiagou	77.82	18.7574
	2063	0.0613426	9.97565e-07	0.749082	16.2486	Permian		93.27	0.914995	19.082		280.45	76.9519	16.6137		83.5	77.0069	16.4762		1158.13	75.8768	14.774		223.571	80.217	11.167		773.96	80.8742	17.5085		854.12	70.1711	8.93757		Sunjiagou	82.24	21.2768
	GP9	0.00369783	1.15423e-07	0.877739	23.4534	Permian		94.79	0.868938	17.786		289.8	76.9825	15.9789		84.67	76.348	15.974		1159.92	76.9948	13.6913		223.927	82.9396	18.5973		778.57	78.6625	14.9917		857.72	77.0664	13.8447		Sunjiagou	82.79	21.5903
	GP10	0.0137165	3.39976e-07	0.774608	17.678	Permian		95.02	0.868447	16.9071		302.07	76.4901	16.3946		87	78.3162	17.5491		1160.83	70.0673	10.0029		224.18	82.0883	21.913		781.18	77.0406	14.1432		867.13	79.1218	14.2555		Sunjiagou	83.74	22.1318
	2062	0.0823293	2.08874e-06	0.676942	12.2087	Permian		95.3	0.897654	18.8542		305	77.7388	17.2413		90.12	77.3125	16.6886		1167.88	76.4387	14.8337		247.726	75.346	9.35393		781.95	79.2918	11.2693		873.29	79.2588	14.9892		Sunjiagou	85.91	23.3687
	GP11	0.0768349	2.26357e-06	0.765509	17.1685	Permian		95.45	0.89452	19.0195		306.9	77.8743	17.4841		93.4	77.1158	17.2759		1168	74.3072	12.8445		255.727	76.3088	8.54973		782.27	78.6674	11.2103		880.6	78.2303	13.2622		Sunjiagou	85.09	22.9013
	2061	0.0981036	4.30645e-06	0.612935	8.62435	Permian		95.71	0.858922	17.6152		325.1	79.1898	17.9983		96.8	78.1472	18.7149		1168.1	72.756	12.0207		257.047	78.9136	14.2438		783.21	79.6575	15.2972		885.5	78.5229	15.2048		Sunjiagou	85.11	22.9127
	2060	0.115942	4.02876e-06	0.713248	14.2419	Permian		96.11	0.872984	17.2276		330.16	77.7872	17.1002		98.02	77.2022	17.6435		1168.25	72.8459	12.3714		265.557	76.9169	12.1931		783.45	82.7556	18.1932		888.3	78.1598	13.7479		Sunjiagou	81.44	20.8208
	GP12	0.0279793	1.02972e-06	0.7573	16.7088	Permian		96.72	0.797692	14.6071		334.4	77.687	16.6597		100.4	77.2576	17.5942		1168.5	70.8046	10.9994		269.977	76.8904	13.2089		783.81	84.8251	19.3245		890.65	77.2222	12.6325		Sunjiagou	81.73	20.9861
	2059	0.0708164	2.75421e-06	0.772456	17.5576	Triassic		97.08	0.895229	19.3477		340	76.7822	15.8902		104.6	76.7367	15.8567		1168.6	76.7046	14.8445		274.93	76.0315	11.0451		784.4	78.9077	15.4506		892.75	73.8022	11.2608		Sunjiagou	85.78	23.2946
	2058	0.130319	3.86037e-06	0.775197	17.711	Triassic		97.28	0.895755	18.9116		345.95	76.9611	15.6593		110.07	77.524	16.8947		1168.68	70.9165	10.8986		277.063	63.2451	4.26579		786.37	76.9347	16.5033		895.74	77.0121	13.4621		Sunjiagou	85.05	22.8785
	GP13	0.130344	3.95657e-06	0.480371	1.20079	Triassic		97.49	0.880431	18.4686		349.2	74.8541	14.4237		112.1	75.7606	15.4611		1168.8	73.8234	12.7932		278.715	74.8198	7.07046		787.52	68.9199	9.56458		896.14	78.1434	13.9689		Sunjiagou	84.79	22.7303
	2057	0.129732	4.06843e-06	0.745228	16.0328	Triassic		97.61	0.843894	15.642		351.62	75.696	12.1859		113.09	75.6806	15.3022		1168.91	75.2879	12.8135		281.839	77.0774	9.55293		788.2	78.3923	15.8646		912.06	79.0103	17.6514		Sunjiagou	82.41	21.3737
	2056	0.0159483	6.74677e-07	0.780077	17.9843	Triassic		97.92	0.880951	18.0138		353.7	77.5382	16.8186		116	75.2966	15.0997		1169.1	69.2082	10.4017		295.757	74.4777	10.9665		801.11	80.4207	14.5205		912.28	78.6744	13.9368
	GP14	0.0406663	1.44559e-06	0.644041	10.3663	Triassic		98.09	0.897793	19.1241		355.92	76.534	15.2198		118.3	79.847	16.132		1169.35	79.1131	18.5384		296.266	73.658	10.431		802.97	82.0383	19.4959		912.48	78.9301	14.8662
	2055	0.0110874	4.73272e-07	0.655048	10.9827	Triassic		98.3	0.879663	18.7295		357.82	76.7263	16.5885		119.94	79.3483	19.1607		1171.8	80.1351	21.1174		300.356	74.1777	8.67166		804.08	79.3913	16.1487		912.59	79.0346	15.4065
	2054	0.0220588	7.59057e-07	0.733985	15.4031	Triassic		98.43	0.876193	17.8902		358.87	76.7421	14.3058		132.6	77.7089	17.5209		1172.2	72.0428	12.4281		304.596	76.1374	8.13593		805.03	83.9592	16.3925		912.72	79.4938	15.1165
	GP15	0.0762445	1.97988e-06	0.753407	16.4908	Triassic		98.6	0.934995	22.0689		359.71	77.0721	15.672		133.15	76.9225	16.1275		1176.21	66.9974	4.95023		308.662	76.8626	11.1393		810.09	83.0865	19.4106		912.96	78.4523	15.6588
	GP16	0.105126	3.29929e-06	0.478688	1.1065	Triassic		98.76	0.943538	22.4222		360.62	72.9474	12.0938		136.36	76.389	15.6537		1185.9	79.3407	20.3924		311.277	78.4323	13.1836		819.48	79.355	13.5538		913.09	79.3208	15.491
								101.09	0.919876	20.6535		360.78	77.2569	15.4931		138.43	75.4038	15.7869		1186.2	79.4959	17.8885		314.63	77.9334	10.4918		831.43	76.7212	11.9156		913.2	79.9439	13.9065
								101.5	0.886321	17.5498		360.86	76.8137	15.8638		141.23	76.191	15.8516		1186.8	75.8822	14.64		322.375	76.9255	11.1832		840.32	78.2518	13.6669		913.44	80.538	14.3837
								101.88	0.865099	15.9188		361.03	76.9966	15.197		143.42	76.1687	16.2235		1187.4	66.9496	8.46213		328.663	76.1778	9.40315		849.1	77.1676	11.6688		913.62	80.0475	15.9996
								103.89	0.849857	15.4746		361.14	76.2422	15.6998		151.04	77.7414	16.9009		1188.2	73.5433	9.38548		337.109	77.9088	14.6861		860.37	72.1569	9.67171		913.8	79.3491	15.0165
								105.5	0.859695	15.4812		362.41	76.0533	15.9323		153.26	76.5615	16.1386		1189.36	72.14	9.208		339.102	77.8554	11.9383		869.89	80.1293	16.9422		913.91	79.1869	17.0179
								108.53	0.821619	13.6017		363.06	73.9563	14.0479		154.92	75.6516	15.3386		1197.09	73.3405	9.99034		339.395	77.0169	10.8083		880.32	74.0475	11.3138		914	78.2839	13.0877
								109.93	0.84763	16.0639		363.67	73.2225	12.5913		158.1	76.8596	16.6107		1199.83	73.0464	8.67266		344.07	77.3234	12.4642		883.3	79.7879	12.1308		914.11	78.8987	12.7505
								111.32	0.846422	14.2543		365.18	76.733	16.4882		160.89	76.4915	15.6321		1200.56	73.2673	9.72577		345.451	76.4478	12.5071		900.25	76.1828	11.6074		914.2	80.2586	17.021
								113.39	0.823426	12.8441		370.05	69.3362	10.0218		163.82	77.0298	15.9494		1201.15	68.5231	5.76905						902.38	79.492	11.7884		915.89	77.8579	15.9977
								117.34	0.87687	17.6722		380.34	71.4125	10.42		169.89	75.7941	14.6751		1203.56	72.1254	15.0292						909.05	81.8649	11.2466		926.9	74.6299	11.9513
								121.92	0.791476	12.3155		384.1	67.4078	4.54505		173.5	76.697	15.5818		1204.11	73.0805	13.0934						940.75	72.7262	10.5203		928.56	77.8636	12.9647
								125.1	0.789791	12.8631		385.82	66.3961	8.47362		176.1	76.4775	14.765		1205.44	73.5063	12.2892						952.9	79.8976	12.7902		936.33	72.4612	10.619
								130	0.796088	12.4944		390.37	72.0088	10.3463		178.11	75.7808	15.2586		1207.65	71.9065	2.40768						1002.7	80.0912	14.0465		938	67.8451	8.88826
								132.4	0.778852	12.3142		390.93	70.6768	10.7163		181.65	75.5503	13.9059		1208.78	75.1021	11.3956										946.61	73.7285	9.74713
								135.64	0.725365	10.2067		391.85	66.876	4.84583		183.05	75.653	13.7455		1209.12	75.0474	10.086										947.78	71.1439	8.91985
								138.58	0.799495	9.73936		398.8	67.7572	2.37564		184.63	78.8956	18.9875		1227.21	69.2339	9.14193										952.2	76.8799	5.45513
								139.9	0.782166	9.80028		399.14	68.3362	7.08161		186.82	76.0647	15.47		1231	66.3371	6.12649										962.4	73.0178	10.5152
								141.95	0.774522	10.7717		420.6	72.2825	4.22891		187.93	75.8266	13.3932		1235.65	64.6327	5.7326										964.54	73.029	8.75178
								179.71	0.761687	7.77971		431.69	70.2347	11.5927		189.15	76.1366	14.9145		1238.94	64.7129	10.5392										973.09	75.3326	8.47169
								183.07	0.803034	12.6459		447.21	72.7987	0.702658		190.84	75.2199	13.4864		1240.76	66.2545	0.93754										977.8	72.1548	8.88667
								190.11	0.69983	7.85703		451.66	71.3704	5.58415		192.27	76.7454	16.0261		1242	66.0038	1.79045										998.18	70.6722	7.55356
								211.66	0.696461	3.96074		454.56	71.0433	6.73526		192.95	75.7894	13.7924		1245.31	71.6047	6.60346										1004.34	71.499	7.49807
								216.93	0.680056	2.88546		467.1	70.9111	9.23864		194.85	76.417	14.4277		1247.91	66.4369	0.466668										1004.99	73.7728	7.20487
								232.35	0.733322	5.8704		476	66.9503	5.87751		197.47	76.7229	15.6801		1248.35	69.2964	4.39114										1005.83	71.2765	8.04868
								246.8	0.746155	3.05459		488.74	79.6109	12.1128		198.5	75.2058	14.9224		1289.76	68.5518	1.44261										1013.79	76.3301	5.42703
								271.68	0.723018	6.8101		510.83	67.4861	3.70735		201.6	75.6934	14.2464		1292.98	66.9034	11.7659										1013.79	76.3301	8.61408
								281.6	0.756576	6.33639		545.35	72.9657	11.2236		202.08	75.332	14.3984		1299.4	70.1392	4.24576										1038.08	72.4284	8.16547
								291.03	0.784558	6.13419		555.3	72.8034	8.16672		202.54	75.8121	14.1148		1305.05	65.1146	1.32323										1056.56	74.6728	9.0336
								302.69	0.713477	5.74038		565.7	68.8491	10.1798		203.07	74.9861	14.3186		1321.93	65.2735	10.8532										1058.6	72.9395	9.32432
								312.4	0.761265	12.2915		583.87	72.9229	11.0064		203.5	74.5993	14.4053		1322.45	65.1845	10.8033
																204.2	75.9744	14.4905
																204.57	75.0956	12.4179
																205.1	75.1035	13.6202
																205.7	77.0661	15.9825
																206.08	77.2141	16.4205
																206.51	75.553	13.2273
																207.85	74.4719	13.8989
																208	73.881	13.2571
																208.34	74.3629	13.4741
																208.35	75.2023	12.8587
																208.55	75.2869	13.6669
																208.86	71.8206	11.9928
																209.35	73.0418	11.8026
																210.08	72.6865	12.6943
																210.15	73.1984	12.1587
																210.56	69.1816	10.649
																210.86	72.5266	12.0281
																211.3	72.4279	11.2223
																211.5	72.415	11.8542
																211.8	73.2331	12.2802
																211.9	69.7762	10.8636
																212.22	74.5131	14.7846
																212.55	75.7799	13.6511
																212.65	75.0165	13.6578
																212.88	76.5487	12.295
																213	76.6032	14.4717
																213.35	74.2351	10.8837
																213.65	72.8298	8.99077
																214.37	74.0524	12.4707
																222.97	73.7261	11.7126
																224.63	74.295	11.4874
																226.44	71.7936	10.5237
																232.75	75.2318	10.37
																251.93	71.7973	11.3517
																253.3	71.6282	11.1557
																256.5	70.7605	9.05366
																258.28	67.7012	3.86467
																260.68	70.7656	10.2623
																262	71.6534	9.11882
																265.1	68.5619	4.35536
																273.86	70.3801	8.30996
																277.96	67.819	8.28785
																283.35	71.7646	12.3521
																284.85	69.5421	10.2594
																289.5	74.0764	12.2441
																302.3	71.7328	9.77001
																307.99	68.8871	8.60918
																316.28	64.0079	10.1444
																318.1	70.4767	6.35541
																326.5	65.5366	0.985155
																336.67	70.4864	6.88122
																337.27	63.1619	9.67068
																339.37	68.3369	10.0984
																343.5	71.3561	14.2594
																344.72	65.9092	2.85357
																352	69.1758	7.00647
																357.3	67.6891	4.52647
																357.9	66.8525	5.63119
																366.3	67.2613	6.13004
																368.63	71.1258	3.61594
																371	68.5543	12.6904
																374.8	65.8314	11.1656
																388.9	72.1218	7.06904
																391.5	70.56	6.39951
																395.88	70.7884	5.73749
																397.25	69.6642	5.84762
																407.1	68.3673	4.97775
																408.62	70.4652	9.82114
																409.8	67.6098	7.34127
																412.5	61.4406	4.72551
																415.5	68.0739	7.68763
																417.6	66.3812	5.65151
																420.67	66.1457	6.92387
																423.25	71.0828	2.06722
																424.92	58.781	7.21736
																432.5	52.7329	3.83041
																435.7	67.5888	7.19591
																439.74	61.7342	4.65585
																441	58.1426	3.7706
																448.61	67.736	7.59783
																451	66.8734	7.81478

## Sheet: MajorElementData
Ref.	Element	23 Na	24 Mg	27 Al	39 K	Tot Ca	48 Ti	56 Fe	55 Mn	m	b	Element
0		66017	12659	1263	28721	3211	998	33426	2660	7.6629e-06	-0.281933	Na
0.5		82407	33928	13544	65346	3231	3569	578916	7666	1.56611e-05	-0.0968191	Mg
1		149624	64270	26597	117309	5768	7078	1175366	15611	3.56401e-06	1.43565	Al
5		702636	331222	128628	409468	26438	34513	5701933	70060	1.33337e-05	-0.439063	K
10		1336508	642399	2445490	781270	49083	74149	11515599	153963	0.000210066	-0.385857	Ca
max		1336508	642399	2445490	781270	49083	74149	11515599	153963	0.000136305	0.0203169	Ti
min		66017	12659	1263	28721	3211	998	33426	2660	8.71185e-07	-0.0114151	Fe
CPS										6.60215e-05	-0.000547409	Mn
Samples	Element	23 Na	24 Mg	27 Al	39 K	Tot Ca			55 Mn	Correction and blank correction
Bw		127519	51008	726261	611990	11082			35690
Bt		116804	70977	790585	656724	10692			36057
Btv		87718	35194	532800	386458	24666			23390
Cg		74703	47168	464475	415212	14994			38115
C		67726	95056	418713	292225	6036			129780
Cg		86300	57397	539162	466644	6963			39958
C		80368	120628	507127	345879	17477			144583
mg (corrected for dilution)
Samples	Element	23 Na	24 Mg	27 Al	39 K	Tot Ca			55 Mn
Bw		0.00104285	0.00105303	0.00603608	0.0115815	0.00291314			0.00353364
Bt		0.000919687	0.00152214	0.00637996	0.0124762	0.00279025			0.00356999
Btv		0.000585362	0.000681535	0.00500183	0.00707076	0.00719344			0.00231554
Cg		0.000435763	0.000962824	0.00463657	0.00764585	0.00414581			0.00377379
C		0.000355567	0.00208779	0.00439192	0.00518605	0.00132315			0.0128516
Cg		0.000569063	0.00120312	0.00503584	0.00867452	0.00161525			0.00395631
C		0.000500879	0.00268852	0.00486458	0.00625916	0.0049282			0.0143176
mol
Samples	Element	23 Na	24 Mg	27 Al	39 K	Tot Ca			55 Mn
Bw		4.53614e-05	4.33257e-05	0.000223711	0.000296215	7.26867e-05			6.43205e-05
Bt		4.00042e-05	6.26265e-05	0.000236456	0.000319098	6.96205e-05			6.4982e-05
Btv		2.54618e-05	2.8041e-05	0.00018538	0.000180846	0.000179486			4.21483e-05
Cg		2.18538e-05	4.45576e-05	0.000179241	0.000208709	0.000263904			7.03529e-05
C		1.86267e-05	9.82577e-05	0.000171534	0.000146364	0.000163605			0.000247271
